# Supplementary material for: Genetic Diversity and Population Dynamics of Invasive Ascidiella aspersa: Insights from Cytochrome Oxidase Subunit I and 18S rDNA Analyses in Korean and Global Populations
Source: MDPI journal article supplement (doi:10.3390/w15223886), 2023-11-07
Supplement: s1 [file s1]

**Table S1.** Haplotype distribution of *Ascidella aspersa* inferred from 80 COI sequences in Korea population. Each column represents the sampling location, and the rows refer to the 14 haplotypes.

|        | <b>Incheon<br/>(IC)</b> | <b>Bieung<br/>(BU)</b> | <b>Wando<br/>(WD)</b> | <b>Yeosu<br/>(YS)</b> | <b>Tongyeong<br/>(TY)</b> | <b>Ulsan<br/>(US)</b> | <b>Yangpo<br/>(YP)</b> | <b>Jukbyeon<br/>(JB)</b> | <b>Donghae<br/>(DH)</b> | <b>Sokcho<br/>(SC)</b> |
|--------|-------------------------|------------------------|-----------------------|-----------------------|---------------------------|-----------------------|------------------------|--------------------------|-------------------------|------------------------|
| Hap_1  | 5                       | 3                      | 0                     | 2                     | 0                         | 1                     | 0                      | 0                        | 1                       | 2                      |
| Hap_2  | 0                       | <b>1</b>               | 0                     | 0                     | 0                         | 0                     | 0                      | 0                        | 0                       | 0                      |
| Hap_3  | 2                       | 3                      | 4                     | 3                     | 5                         | 4                     | 2                      | 4                        | 4                       | 2                      |
| Hap_4  | 0                       | <b>1</b>               | 0                     | 0                     | 0                         | 0                     | 0                      | 0                        | 0                       | 0                      |
| Hap_5  | 1                       | 1                      | 0                     | 0                     | 0                         | 1                     | 1                      | 1                        | 0                       | 1                      |
| Hap_6  | 1                       | 0                      | 0                     | 0                     | 0                         | 0                     | 0                      | 0                        | 1                       | 0                      |
| Hap_7  | 0                       | 0                      | 0                     | 0                     | 1                         | 0                     | 0                      | 1                        | 1                       | 0                      |
| Hap_8  | 1                       | 0                      | 0                     | 1                     | 0                         | 0                     | 3                      | 0                        | 0                       | 0                      |
| Hap_9  | 0                       | 0                      | 0                     | 0                     | 1                         | 0                     | 2                      | 2                        | 0                       | 3                      |
| Hap_10 | 0                       | 0                      | 0                     | 0                     | <b>1</b>                  | 0                     | 0                      | 0                        | 0                       | 0                      |
| Hap_11 | 0                       | 0                      | 1                     | 1                     | 0                         | 1                     | 0                      | 0                        | 0                       | 0                      |
| Hap_12 | 0                       | 0                      | <b>1</b>              | 0                     | 0                         | 0                     | 0                      | 0                        | 0                       | 0                      |
| Hap_13 | 0                       | 0                      | <b>1</b>              | 0                     | 0                         | 0                     | 0                      | 0                        | 0                       | 0                      |
| Hap_14 | 0                       | 0                      | 0                     | <b>1</b>              | 0                         | 0                     | 0                      | 0                        | 0                       | 0                      |

**Table S2.** Results of mt-COI analysis of molecular variance (AMOVA) for *Ascidrella aspersa* along the coast of Korea and global population.

|                   | Source of variation | d.f.                                          | Sum of squares | Variance components | Percentage of variation |
|-------------------|---------------------|-----------------------------------------------|----------------|---------------------|-------------------------|
| Korean population | Among populations   | 2                                             | 1.653          | 0.01752             | 4.39                    |
|                   | Within populations  | 77                                            | 29.359         | 0.38129             | 95.61                   |
|                   | Total               | 79                                            | 31.012         | 0.39881             |                         |
|                   |                     | Fst = 0.04394<br>p-values = 0.09271 ± 0.01575 |                |                     |                         |
| Global population | Among populations   | 8                                             | 46.852         | 0.38665 Va          | 27.69                   |
|                   | Within populations  | 145                                           | 146.380        | 1.00952 Vb          | 72.31                   |
|                   | Total               | 153                                           | 193.232        | 1.39617             |                         |
|                   |                     | Fst = 0.27694<br>p-values = 0.00098           |                |                     |                         |

**Table S3.** The pairwise genetic distances (K2P) mt-COI results between Korean populations.

|                           | <b>Incheon<br/>(IC)</b> | <b>Bieung<br/>(BU)</b> | <b>Wando<br/>(WD)</b> | <b>Yeosu<br/>(YS)</b> | <b>Tongyeong<br/>(TY)</b> | <b>Ulsan<br/>(US)</b> | <b>Yangpo<br/>(YP)</b> | <b>Jukbyeon<br/>(JB)</b> | <b>Donghae<br/>(DH)</b> | <b>Sokcho<br/>(SC)</b> |
|---------------------------|-------------------------|------------------------|-----------------------|-----------------------|---------------------------|-----------------------|------------------------|--------------------------|-------------------------|------------------------|
| <b>Incheon<br/>(IC)</b>   | 0.00000                 |                        |                       |                       |                           |                       |                        |                          |                         |                        |
| <b>Bieung<br/>(BU)</b>    | <b>-0.05412</b>         | 0.00000                |                       |                       |                           |                       |                        |                          |                         |                        |
| <b>Wando<br/>(WD)</b>     | 0.24345                 | 0.08510                | 0.00000               |                       |                           |                       |                        |                          |                         |                        |
| <b>Tongyeong<br/>(TY)</b> | 0.18203                 | 0.08040                | 0.00689               | 0.00000               |                           |                       |                        |                          |                         |                        |
| <b>Yeosu<br/>(YS)</b>     | 0.04171                 | <b>-0.01011</b>        | 0.01299               | <b>-0.10353</b>       | 0.00000                   |                       |                        |                          |                         |                        |
| <b>Donghae<br/>(DH)</b>   | 0.08069                 | <b>-0.03432</b>        | <b>-0.03927</b>       | 0.00805               | <b>-0.04313</b>           | 0.00000               |                        |                          |                         |                        |
| <b>Jukbyeon<br/>(JB)</b>  | 0.10561                 | <b>-0.01094</b>        | <b>-0.08571</b>       | 0.03827               | <b>-0.01261</b>           | <b>-0.08108</b>       | 0.00000                |                          |                         |                        |
| <b>Ulsan<br/>(US)</b>     | 0.02314                 | <b>-0.02612</b>        | 0.02433               | <b>-0.09979</b>       | <b>-0.14324</b>           | <b>-0.03949</b>       | <b>-0.01818</b>        | 0.00000                  |                         |                        |
| <b>Yangpo<br/>(YP)</b>    | 0.17392                 | 0.07377                | <b>-0.02463</b>       | 0.02057               | 0.00100                   | 0.00297               | <b>-0.04464</b>        | 0.02056                  | 0.00000                 |                        |
| <b>Sokcho<br/>(SC)</b>    | 0.00789                 | <b>-0.02598</b>        | 0.07692               | 0.12583               | 0.02430                   | 0.03743               | <b>-0.05357</b>        | 0.00533                  | 0.05751                 | 0.00000                |

**Table S4.** Haplotype distribution of *Ascidrella aspersa* inferred from 154 mt-COI sequences in the global population. Each column represents the sampling location, and the rows refer to the 21 haplotypes in global population.

|        | KOREA<br>(KO) | CANADA<br>(CA) | ENGLAND<br>(EN) | FRANCE<br>(FR) | INDIA<br>(IN) | JAPAN<br>(JA) | SPAIN<br>(SP) | SWEDEN<br>(SW) | USA<br>(US) |
|--------|---------------|----------------|-----------------|----------------|---------------|---------------|---------------|----------------|-------------|
| Hap_1  | 23            | 1              | 2               | 0              | 0             | 1             | 0             | 1              | 2           |
| Hap_2  | 36            | 0              | 8               | 1              | 0             | 4             | 6             | 0              | 8           |
| Hap_3  | 1             | 0              | 0               | 1              | 0             | 2             | 7             | 0              | 0           |
| Hap_4  | 2             | 0              | 0               | 0              | 0             | 0             | 1             | 0              | 0           |
| Hap_5  | 0             | 0              | 1               | 0              | 0             | 0             | 0             | 0              | 0           |
| Hap_6  | 0             | 0              | 1               | 0              | 0             | 0             | 0             | 0              | 0           |
| Hap_7  | 0             | 0              | 0               | 1              | 0             | 0             | 0             | 0              | 0           |
| Hap_8  | 6             | 0              | 0               | 0              | 0             | 0             | 0             | 0              | 0           |
| Hap_9  | 0             | 0              | 0               | 0              | 1             | 1             | 0             | 0              | 0           |
| Hap_10 | 9             | 0              | 0               | 0              | 0             | 0             | 3             | 1              | 0           |
| Hap_11 | 1             | 0              | 0               | 0              | 0             | 0             | 0             | 0              | 0           |
| Hap_12 | 1             | 0              | 0               | 0              | 0             | 0             | 0             | 0              | 0           |
| Hap_13 | 0             | 0              | 0               | 0              | 0             | 0             | 3             | 0              | 0           |
| Hap_14 | 0             | 0              | 0               | 0              | 0             | 0             | 6             | 0              | 0           |
| Hap_15 | 0             | 0              | 0               | 0              | 0             | 0             | 1             | 0              | 0           |
| Hap_16 | 0             | 0              | 0               | 0              | 0             | 0             | 4             | 0              | 0           |
| Hap_17 | 0             | 0              | 0               | 0              | 0             | 0             | 1             | 0              | 0           |
| Hap_18 | 0             | 0              | 0               | 0              | 0             | 0             | 1             | 0              | 0           |
| Hap_19 | 0             | 0              | 0               | 0              | 0             | 0             | 1             | 0              | 0           |
| Hap_20 | 0             | 0              | 0               | 0              | 0             | 0             | 1             | 0              | 0           |
| Hap_21 | 3             | 0              | 0               | 0              | 0             | 0             | 0             | 0              | 0           |

**Table S5.** The pairwise genetic distances (K2P) mt-COI results between Global populations.

|                         | <b>Korea<br/>(KO)</b> | <b>Canada<br/>(CA)</b> | <b>England<br/>(EN)</b> | <b>France<br/>(FR)</b> | <b>India<br/>(IN)</b> | <b>Japan<br/>(JA)</b> | <b>Spain<br/>(SP)</b> | <b>Sweden<br/>(SW)</b> | <b>USA<br/>(US)</b> |
|-------------------------|-----------------------|------------------------|-------------------------|------------------------|-----------------------|-----------------------|-----------------------|------------------------|---------------------|
| <b>Korea<br/>(KO)</b>   | 0.00000               |                        |                         |                        |                       |                       |                       |                        |                     |
| <b>Canada<br/>(CA)</b>  | <b>-0.21246</b>       | 0.00000                |                         |                        |                       |                       |                       |                        |                     |
| <b>England<br/>(EN)</b> | <b>-0.00419</b>       | 0.29244                | 0.00000                 |                        |                       |                       |                       |                        |                     |
| <b>France<br/>(FR)</b>  | 0.00011               | 0.00132                | 0.17892                 | 0.00000                |                       |                       |                       |                        |                     |
| <b>India<br/>(IN)</b>   | 0.92672               | 1.00000                | 0.96693                 | 0.93738                | 0.00000               |                       |                       |                        |                     |
| <b>Japan<br/>(JA)</b>   | <b>-0.00759</b>       | 0.23100                | 0.04821                 | <b>-0.13067</b>        | 0.96054               | 0.00000               |                       |                        |                     |
| <b>Spain<br/>(SP)</b>   | 0.14438               | 0.10233                | 0.19557                 | <b>-0.04963</b>        | 0.93267               | 0.03478               | 0.00000               |                        |                     |
| <b>Sweden<br/>(SW)</b>  | <b>-0.12073</b>       | <b>-1.00000</b>        | 0.21460                 | <b>-0.07085</b>        | 0.96777               | 0.05595               | 0.01982               | 0.00000                |                     |
| <b>USA<br/>(US)</b>     | 0.00411               | 0.55556                | <b>-0.06552</b>         | 0.22517                | 0.97791               | 0.05169               | 0.18201               | 0.40688                | 0.00000             |

**Table S6.** Haplotype distribution of *Ascidella aspersa* inferred from 124 18S-rDNA sequences in the global population. Each column represents the sampling location, and the rows refer to the 5 haplotypes in global population.

| Haplotype | Korea<br>(KO) | England<br>(EN) | Japan<br>(JA) | Spain<br>(SP) | Sweden<br>(SW) |
|-----------|---------------|-----------------|---------------|---------------|----------------|
| Hap 1     | 81            | 10              | 8             | 21            | 2              |
| Hap 2     | 0             | 0               | 0             | 1             | 0              |
| Hap 3     | 0             | 1               | 0             | 0             | 0              |
| Hap 4     | 0             | 1               | 0             | 0             | 0              |
| Hap 5     | 2             | 0               | 0             | 0             | 0              |

**Table S7.** Results of 18S-rDNA analysis of molecular variance (AMOVA) for *Ascidella aspersa* along the coast of Korea and global population.

| Source of variation | d.f                                         | Sum of squares | Variance components | Percentage variation |
|---------------------|---------------------------------------------|----------------|---------------------|----------------------|
| Among populations   | 2                                           | 0.065          | 0.00033 Va          | 1.39                 |
| Within populations  | 124                                         | 2.921          | 0.02356 Vb          | 98.61                |
| Total               | 126                                         | 2.986          | 0.02389             |                      |
| Fixation Index      | Fst: 0.01390<br>p-value = 0.06940 ± 0.00772 |                |                     |                      |

**Table S8.** The pairwise genetic distances (K2P) among populations 18S-rDNA results between Global populations.

|                 | Korea<br>(KO) | England<br>(EN) | Japan<br>(JA) | Spain<br>(SP) | Sweden<br>(SW) |
|-----------------|---------------|-----------------|---------------|---------------|----------------|
| Korea<br>(KO)   | -             |                 |               |               |                |
| England<br>(EN) | -0.0000000221 |                 |               |               |                |
| Japan<br>(JA)   | 0.0000000000  | -0.0000000221   |               |               |                |
| Spain<br>(SP)   | 0.0000000000  | 0.0000000055    | 0.0000000000  |               |                |
| Sweden<br>(SW)  | 0.0000000000  | -0.0000000221   | 0.0000000000  | 0.0000000000  | -              |
